# Supplementary material
Source: HighWire-hosted journal article supplement (https://qualitysafety.bmj.com/content/bmjqs-2021-014095)
Supplement: inline-supplementary-material-1 [file inline-supplementary-material-1.pdf]

Table S1. Items in EnSuSalud used to create patient experience ratings within domains of user experience and competent care and systems.

| High-quality health system domains |                   | EnSuSalud item                                                                                                                                                                                                                                                                                                                                                                                                                                                                                                                                                                                                                                                                                                                              |                                                                                                                                                                                                                                                                                                                                                 |
|------------------------------------|-------------------|---------------------------------------------------------------------------------------------------------------------------------------------------------------------------------------------------------------------------------------------------------------------------------------------------------------------------------------------------------------------------------------------------------------------------------------------------------------------------------------------------------------------------------------------------------------------------------------------------------------------------------------------------------------------------------------------------------------------------------------------|-------------------------------------------------------------------------------------------------------------------------------------------------------------------------------------------------------------------------------------------------------------------------------------------------------------------------------------------------|
| Component                          | Sub-component     | Component                                                                                                                                                                                                                                                                                                                                                                                                                                                                                                                                                                                                                                                                                                                                   | Calculation and Cronbach's $\alpha$                                                                                                                                                                                                                                                                                                             |
| Positive user experience           |                   |                                                                                                                                                                                                                                                                                                                                                                                                                                                                                                                                                                                                                                                                                                                                             |                                                                                                                                                                                                                                                                                                                                                 |
| Respect                            | Dignity (9 items) | <p>How would you rate on a scale of 1 to 5:</p> <ul style="list-style-type: none"> <li>- Administrative staff:               <ul style="list-style-type: none"> <li>○ kindness and courtesy</li> <li>○ respect</li> <li>○ interest in you and willingness to attend</li> </ul> </li> <li>- Non-medical personnel (nurses, laboratory technician, pharmacy technicians, etc)               <ul style="list-style-type: none"> <li>○ kindness and courtesy</li> <li>○ respect</li> <li>○ interest in you and willingness to attend</li> </ul> </li> <li>- Doctors               <ul style="list-style-type: none"> <li>○ kindness and courtesy</li> <li>○ respect</li> <li>○ interest in you and willingness to attend</li> </ul> </li> </ul> | <p>Standardized scales were generated for each 3-item set and used to create one overall standardized scale.</p> <ul style="list-style-type: none"> <li>• <math>\alpha</math> admin: 0.91</li> <li>• <math>\alpha</math> non-medical: 0.91</li> <li>• <math>\alpha</math> doctors: 0.94</li> <li>• <math>\alpha</math> overall: 0.64</li> </ul> |
|                                    | Privacy (1 item)  | How would you rate the privacy of care on a scale of 1 to 10?                                                                                                                                                                                                                                                                                                                                                                                                                                                                                                                                                                                                                                                                               | Item responses were standardized                                                                                                                                                                                                                                                                                                                |

|            |                               |                                                                                                                                                                                                                                                                                                                                                                                                                                                                                                                                                                                                                                                                                                                                                                                                                                       |                                                                               |
|------------|-------------------------------|---------------------------------------------------------------------------------------------------------------------------------------------------------------------------------------------------------------------------------------------------------------------------------------------------------------------------------------------------------------------------------------------------------------------------------------------------------------------------------------------------------------------------------------------------------------------------------------------------------------------------------------------------------------------------------------------------------------------------------------------------------------------------------------------------------------------------------------|-------------------------------------------------------------------------------|
|            | Clear communication (4 items) | <ul style="list-style-type: none"> <li>· How would you rate on a scale of 1 to 5:               <ul style="list-style-type: none"> <li>- clarity of information provided by non-medical assistance personnel</li> <li>- clarity of information provided by doctors</li> </ul> </li> <li>How would you rate on a scale of 1 to 10:               <ul style="list-style-type: none"> <li>- the information provided about your health status</li> <li>- how clearly the treatment and guidelines were explained</li> </ul> </li> </ul>                                                                                                                                                                                                                                                                                                  | Responses to these 4 items were standardized into a scale.<br>$\alpha$ : 0.73 |
| User focus | Short wait times (1 item)     | <ul style="list-style-type: none"> <li>· How would you rate the waiting time for care on a scale of 1 to 10?</li> </ul>                                                                                                                                                                                                                                                                                                                                                                                                                                                                                                                                                                                                                                                                                                               | Item responses were standardized                                              |
|            | Ease of use (11 items)        | <ul style="list-style-type: none"> <li>· How would you rate on a scale of 1 to 5:               <ul style="list-style-type: none"> <li>○ clarity of information provided by administrative staff</li> </ul> </li> <li>· How would you rate on a scale of 1 to 10:               <ul style="list-style-type: none"> <li>- location of the facility</li> <li>- compliance with medical care hours</li> <li>- convenience and comfort of the environment of the facility</li> <li>- accessibility of the facility</li> <li>- seats or waiting area of the facility</li> <li>- cleaning – hygiene</li> <li>- signage and orientation posters of the facility</li> <li>- health infrastructure of the facility</li> <li>- administrative procedure of the facility</li> <li>- attention of the administrative staff</li> </ul> </li> </ul> | Responses to 11 items were standardized into a scale.<br>$\alpha$ : 0.89      |

| Competent care and systems     |                               |                                                                                                                                                                                                                                                                                      |                                                                      |
|--------------------------------|-------------------------------|--------------------------------------------------------------------------------------------------------------------------------------------------------------------------------------------------------------------------------------------------------------------------------------|----------------------------------------------------------------------|
| Evidence-based, effective care | Provider competence (2 items) | <ul style="list-style-type: none"> <li>· How would you rate on a scale of 1 to 5:               <ul style="list-style-type: none"> <li>- confidence and security inspired by non-medical personnel</li> <li>- confidence and security inspired by your doctor</li> </ul> </li> </ul> | Responses to 2 items were standardized into a scale. $\alpha$ : 0.48 |
|                                | Timely action (1 item)        | <ul style="list-style-type: none"> <li>· How would you rate on a scale of 1 to 10 the time that passed from when you requested the appointment to the date of consultation?</li> </ul>                                                                                               | Item responses were standardized                                     |

**Table S2: Characteristics of excluded observations**

|                          | Excluded<br>(N = 382) | Included<br>(N = 13432) |
|--------------------------|-----------------------|-------------------------|
| <b>Gender</b>            |                       |                         |
| Male                     | 148 (52.2%)           | 5350 (39.5%)            |
| Female                   | 136 (47.8%)           | 8182 (60.5%)            |
| <b>Age categories</b>    |                       |                         |
| <30 years                | 95 (33.4%)            | 4144 (30.6%)            |
| >=30 & <45 years         | 76 (26.7%)            | 3633 (26.8%)            |
| >=45 & <60 years         | 64 (22.3%)            | 3144 (23.2%)            |
| >=60 years               | 50 (17.6%)            | 2613 (19.3%)            |
| <b>Region</b>            |                       |                         |
| Costa (Coast)            | 84 (29.4%)            | 3303 (24.4%)            |
| Selva (Jungle)           | 73 (25.7%)            | 3127 (23.1%)            |
| Sierra (Mountain)        | 42 (14.5%)            | 1292 (9.5%)             |
| Metropolitan Lima        | 87 (30.4%)            | 5811 (42.9%)            |
| <b>Wealth quintile</b>   |                       |                         |
| 1st (poorest)            | 51 (17.8%)            | 2134 (15.8%)            |
| 2nd                      | 51 (17.8%)            | 2254 (16.7%)            |
| 3rd                      | 51 (17.7%)            | 2413 (17.8%)            |
| 4th                      | 56 (19.6%)            | 2631 (19.4%)            |
| 5th (wealthiest)         | 78 (27.2%)            | 4101 (30.3%)            |
| <b>Education level</b>   |                       |                         |
| < Primary                | 18 (6.3%)             | 1052 (7.8%)             |
| Completed primary        | 21 (7.4%)             | 1015 (7.5%)             |
| Some/completed secondary | 123 (44.4%)           | 5604 (41.4%)            |
| Some/completed tertiary  | 116 (41.9%)           | 5862 (43.3%)            |
| <b>Purpose of visit</b>  |                       |                         |
| Existing disease         | 9 (72.5%)             | 5906 (44.0%)            |
| New disease              | 2 (9.9%)              | 2963 (22.1%)            |
| Pregnancy check          | 0 (0.0%)              | 606 (4.5%)              |
| Medical check            | 0 (0.0%)              | 2610 (19.4%)            |
| Discomfort, pain, fever  | 2 (17.6%)             | 1351 (10.1%)            |
| <b>Type of visit</b>     |                       |                         |
| Outside referral         | 27 (9.5%)             | 1454 (10.7%)            |
| Internal referral        | 18 (6.2%)             | 532 (3.9%)              |
| Recurring visit          | 130 (45.6%)           | 7003 (51.8%)            |
| First visit              | 110 (38.7%)           | 4544 (33.6%)            |
| <b>Facility type</b>     |                       |                         |
| Ministry of Health       | 164 (57.8%)           | 6156 (45.5%)            |
| EsSalud Insurance        | 53 (18.7%)            | 4231 (31.3%)            |
| Armed forces & police    | 25 (8.5%)             | 1142 (8.4%)             |
| Private                  | 43 (15.0%)            | 2004 (14.8%)            |

Weighted based on sampling weight scaled to full population

Table S3. Full results from multilevel ordinal logistic regression models for 3-category versions of satisfaction (two versions of categorization) and NPS and from multilevel linear regression model for 10-point NPS

|                                                     | Satisfaction: 3-category <sup>a</sup> |            | NPS -3 categories |            | Satisfaction: 3-category <sup>b</sup> |            | 10-point NPS |              |
|-----------------------------------------------------|---------------------------------------|------------|-------------------|------------|---------------------------------------|------------|--------------|--------------|
|                                                     | AOR                                   | [95% CI]   | AOR               | [95% CI]   | AOR                                   | [95% CI]   | Coeff        | [95% CI]     |
| <b>Contextual</b>                                   |                                       |            |                   |            |                                       |            |              |              |
| % poverty in the district                           | 1.00                                  | 1.00, 1.01 | 1.00              | 0.99, 1.00 | 1.00                                  | 1.00, 1.01 | 0.00         | 0.00, 0.00   |
| Region (Coast)                                      |                                       |            |                   |            |                                       |            |              |              |
| Jungle                                              | 0.99                                  | 0.80, 1.23 | 1.14              | 0.87, 1.49 | 1.03                                  | 0.84, 1.28 | 0.03         | -0.11, 0.18  |
| Andean                                              | 0.91                                  | 0.72, 1.14 | 1.93              | 1.44, 2.57 | 0.93                                  | 0.74, 1.17 | 0.25         | 0.10, 0.41   |
| Metropolitan Lima                                   | 0.81                                  | 0.59, 1.10 | 1.50              | 1.04, 2.17 | 0.90                                  | 0.67, 1.21 | 0.20         | 0.00, 0.40   |
| <b>Facility-level</b>                               |                                       |            |                   |            |                                       |            |              |              |
| Facility type (Ministry of Health)                  |                                       |            |                   |            |                                       |            |              |              |
| EsSalud insurance                                   | 0.92                                  | 0.76, 1.10 | 0.80              | 0.63, 1.01 | 0.95                                  | 0.79, 1.14 | -0.21        | -0.34, -0.09 |
| Armed forces & police                               | 0.86                                  | 0.57, 1.29 | 0.69              | 0.43, 1.11 | 0.79                                  | 0.54, 1.16 | -0.39        | -0.64, -0.13 |
| Private                                             | 1.42                                  | 0.96, 2.12 | 1.39              | 0.96, 2.02 | 0.95                                  | 0.69, 1.32 | 0.09         | -0.12, 0.29  |
| Facility level (Primary)                            |                                       |            |                   |            |                                       |            |              |              |
| Secondary                                           | 1.02                                  | 0.84, 1.23 | 1.16              | 0.92, 1.47 | 1.05                                  | 0.87, 1.27 | 0.11         | -0.02, 0.24  |
| Tertiary                                            | 1.25                                  | 0.94, 1.67 | 1.75              | 1.22, 2.51 | 1.22                                  | 0.92, 1.62 | 0.32         | 0.13, 0.51   |
| <b>Individual-level sociodemographic and health</b> |                                       |            |                   |            |                                       |            |              |              |
| Age (<30 years)                                     |                                       |            |                   |            |                                       |            |              |              |
| ≥ 30 & <45                                          | 1.03                                  | 0.92, 1.16 | 0.94              | 0.85, 1.04 | 1.05                                  | 0.94, 1.17 | -0.05        | -0.11, 0.01  |
| ≥ 45 & <60                                          | 1.13                                  | 0.99, 1.28 | 0.99              | 0.88, 1.10 | 1.17                                  | 1.03, 1.32 | 0.00         | -0.06, 0.07  |
| ≥60 years                                           | 1.35                                  | 1.17, 1.57 | 1.01              | 0.89, 1.15 | 1.33                                  | 1.16, 1.53 | 0.05         | -0.02, 0.13  |
| Gender(male)                                        |                                       |            |                   |            |                                       |            |              |              |
| Female                                              | 0.98                                  | 0.90, 1.07 | 0.99              | 0.92, 1.07 | 0.98                                  | 0.90, 1.07 | 0.00         | -0.05, 0.04  |
| Wealth (1 <sup>st</sup> , poorest)                  |                                       |            |                   |            |                                       |            |              |              |
| 2nd                                                 | 1.02                                  | 0.89, 1.17 | 1.01              | 0.89, 1.14 | 0.95                                  | 0.83, 1.08 | -0.03        | -0.10, 0.04  |
| 3rd                                                 | 1.08                                  | 0.93, 1.24 | 1.02              | 0.89, 1.15 | 0.97                                  | 0.84, 1.12 | -0.07        | -0.14, 0.01  |

|                                                                   | Satisfaction: 3-category <sup>a</sup> |            | NPS -3 categories |            | Satisfaction: 3-category <sup>b</sup> |            | 10-point NPS |              |
|-------------------------------------------------------------------|---------------------------------------|------------|-------------------|------------|---------------------------------------|------------|--------------|--------------|
|                                                                   | AOR                                   | [95% CI]   | AOR               | [95% CI]   | AOR                                   | [95% CI]   | Coeff        | [95% CI]     |
| 4th                                                               | 1.16                                  | 0.99, 1.35 | 0.95              | 0.83, 1.09 | 1.03                                  | 0.88, 1.20 | -0.10        | -0.18, -0.02 |
| 5th (wealthiest)                                                  | 1.05                                  | 0.88, 1.25 | 0.94              | 0.80, 1.09 | 1.06                                  | 0.90, 1.26 | -0.16        | -0.24, -0.07 |
| Education (<Primary)                                              |                                       |            |                   |            |                                       |            |              |              |
| Completed primary                                                 | 1.08                                  | 0.89, 1.33 | 0.97              | 0.82, 1.16 | 1.08                                  | 0.89, 1.31 | 0.00         | -0.10, 0.11  |
| Some/completed secondary                                          | 1.02                                  | 0.87, 1.19 | 0.88              | 0.76, 1.02 | 1.10                                  | 0.94, 1.28 | -0.05        | -0.13, 0.03  |
| Some/completed tertiary                                           | 0.99                                  | 0.83, 1.18 | 0.80              | 0.69, 0.94 | 1.10                                  | 0.94, 1.28 | -0.09        | -0.17, 0.00  |
| Self-rated health (0 - 20)                                        | 1.05                                  | 1.04, 1.07 | 1.01              | 1.00, 1.03 | 1.05                                  | 1.03, 1.06 | 0.01         | 0.01, 0.02   |
| Purpose of visit (Existing disease)                               |                                       |            |                   |            |                                       |            |              |              |
| New disease                                                       | 0.96                                  | 0.84, 1.09 | 1.09              | 0.97, 1.22 | 0.93                                  | 0.82, 1.06 | 0.00         | -0.06, 0.07  |
| Pregnancy check                                                   | 1.15                                  | 0.92, 1.44 | 1.00              | 0.82, 1.21 | 1.16                                  | 0.94, 1.43 | -0.03        | -0.15, 0.08  |
| Medical check                                                     | 1.03                                  | 0.90, 1.18 | 1.00              | 0.89, 1.13 | 0.99                                  | 0.87, 1.13 | 0.01         | -0.06, 0.08  |
| Discomfort, pain, fever                                           | 0.81                                  | 0.70, 0.95 | 0.88              | 0.76, 1.01 | 0.83                                  | 0.71, 0.96 | -0.08        | -0.16, 0.00  |
| Type of visit (outside referral)                                  |                                       |            |                   |            |                                       |            |              |              |
| Internal referral                                                 | 1.08                                  | 0.87, 1.35 | 0.97              | 0.79, 1.18 | 1.04                                  | 0.84, 1.30 | 0.05         | -0.06, 0.17  |
| Recurring visit                                                   | 1.12                                  | 0.98, 1.29 | 1.02              | 0.89, 1.16 | 1.03                                  | 0.90, 1.19 | 0.05         | -0.02, 0.13  |
| First visit                                                       | 1.24                                  | 1.06, 1.44 | 0.94              | 0.81, 1.08 | 1.17                                  | 1.00, 1.36 | 0.03         | -0.05, 0.11  |
| <b>Patient-reported experience measures (standardized scales)</b> |                                       |            |                   |            |                                       |            |              |              |
| Dignity                                                           | 1.77                                  | 1.60, 1.95 | 1.05              | 0.96, 1.16 | 1.94                                  | 1.76, 2.14 | 0.05         | 0.00, 0.10   |
| Privacy                                                           | 0.97                                  | 0.92, 1.03 | 1.10              | 1.04, 1.16 | 1.03                                  | 0.97, 1.09 | 0.07         | 0.04, 0.10   |
| Communication                                                     | 2.73                                  | 2.47, 3.02 | 2.02              | 1.83, 2.23 | 2.81                                  | 2.53, 3.13 | 0.41         | 0.36, 0.46   |
| Short wait time                                                   | 1.21                                  | 1.15, 1.28 | 1.06              | 1.00, 1.11 | 1.26                                  | 1.19, 1.33 | 0.05         | 0.02, 0.08   |
| Ease of use                                                       | 1.27                                  | 1.15, 1.41 | 3.84              | 3.46, 4.25 | 1.22                                  | 1.10, 1.35 | 0.83         | 0.77, 0.88   |
| Provider competence                                               | 1.04                                  | 0.95, 1.14 | 0.94              | 0.86, 1.03 | 1.08                                  | 0.98, 1.19 | -0.03        | -0.08, 0.02  |
| Timely action                                                     | 1.11                                  | 1.05, 1.17 | 1.18              | 1.12, 1.24 | 1.12                                  | 1.06, 1.19 | 0.13         | 0.10, 0.16   |

a: classified "satisfied and very satisfied" into "satisfied" / b: "classified only "very satisfied" into "satisfied". AOR: Adjusted odds ratio. NPS: Net promoter score.

Table S4: Explained variance by health service quality factors (positive user experience and competence of care and system) from ordinal logistic regression models for 3-category versions of satisfaction (two versions of categorization) and NPS (Pseudo R<sup>2</sup>) and from linear regression model for 10-point NPS (R<sup>2</sup>)

|         | Satisfaction: 3 category <sup>a</sup> | NPS: 3 categories | Satisfaction: alternative 3 category <sup>b</sup> | 10-point NPS |
|---------|---------------------------------------|-------------------|---------------------------------------------------|--------------|
| Model 1 | 0.033                                 | 0.044             | 0.035                                             | 0.077        |
| Model 2 | 0.199                                 | 0.213             | 0.220                                             | 0.372        |

a: classified "satisfied and very satisfied" into "satisfied" / b: "classified only "very satisfied" into "satisfied".

Model 1: adjusted for contextual, facility-level, and individual-level factors

Model 2: adjusted for contextual, facility-level, individual-level and patient-reported experience factors

NPS: Net promoter score

**Figure S1: Distribution of alternative satisfaction classification by facility recommendation (NPS) responses**

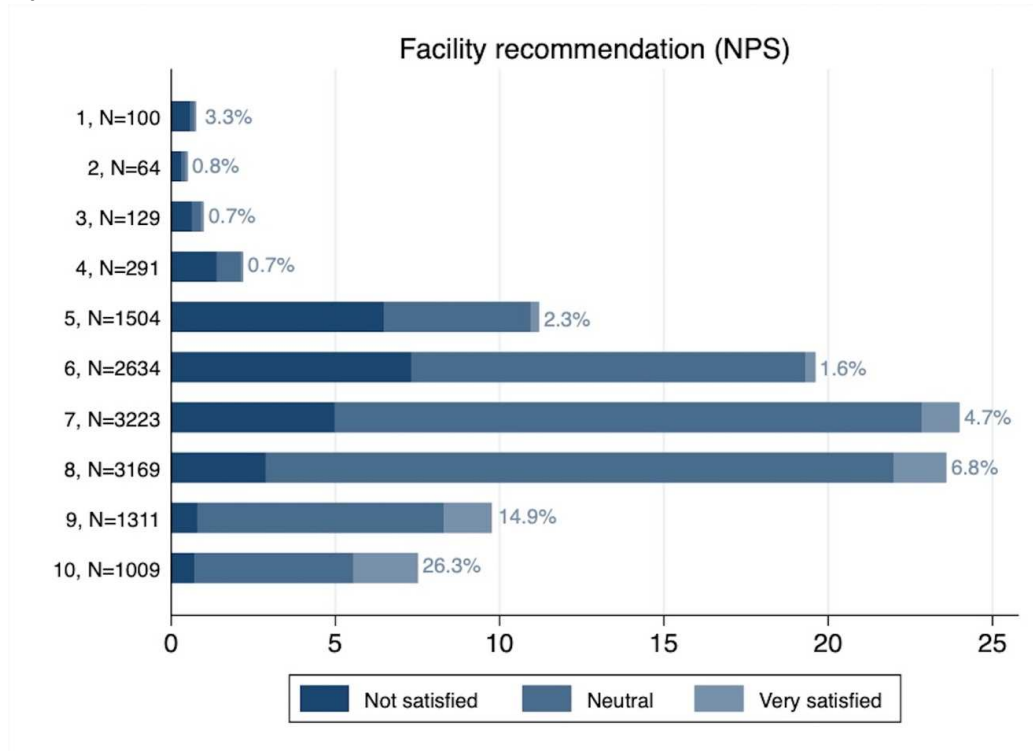



**Figure S2: Facility score and 95% confidence interval using alternative satisfaction classification**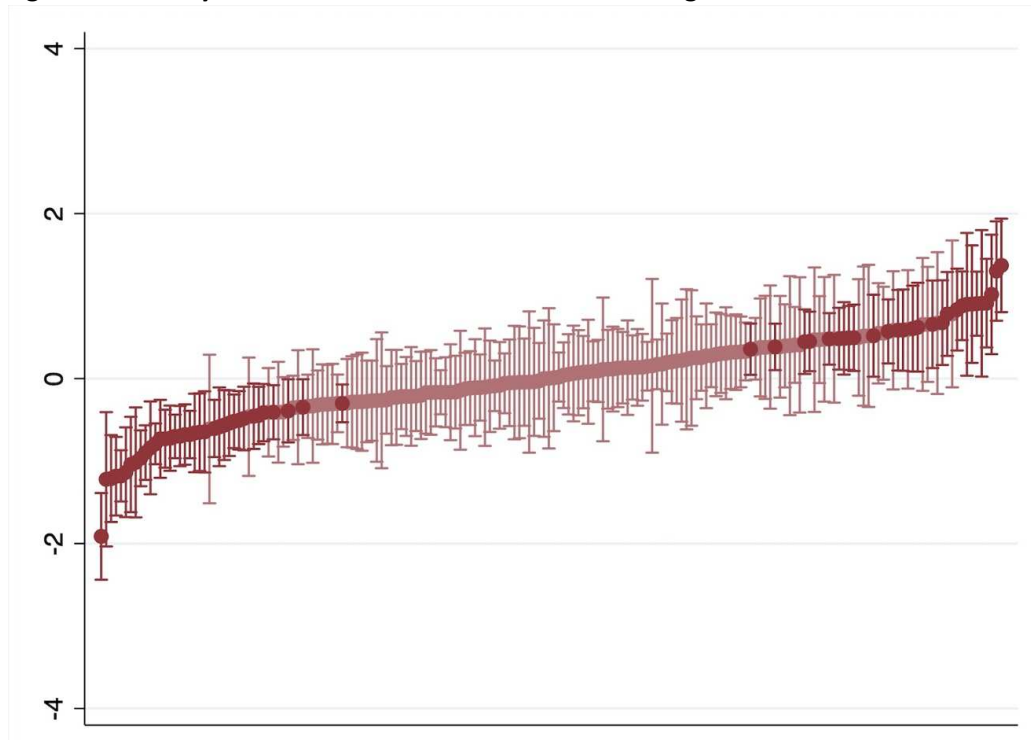

Dark red indicates facilities where the 95% confidence interval excludes the null (0.0). 120 of 184 facilities are indistinguishable from average using this measure (adjusted for case mix).

Intraclass correlation for this version of satisfaction is 0.117 unadjusted, 0.097 adjusted for case mix.

**Table S5: Patient ratings within the average category of satisfaction (alternative classification) cat divided by NPS category. N=120 facilities**

|                     | Below<br>average NPS<br>(N = 24) | Average NPS<br>(N = 63) | Above<br>average NPS<br>(N = 33) | p-value |
|---------------------|----------------------------------|-------------------------|----------------------------------|---------|
|                     | Mean (SD)                        | Mean (SD)               | Mean (SD)                        |         |
| Dignity             | -0.04 (0.23)                     | 0.06 (0.35)             | 0.21 (0.31)                      | 0.011   |
| Privacy             | -0.29 (0.47)                     | 0.11 (0.34)             | 0.42 (0.32)                      | <0.001  |
| Communication       | -0.12 (0.22)                     | 0.07 (0.28)             | 0.30 (0.27)                      | <0.001  |
| Short wait time     | -0.33 (0.41)                     | 0.09 (0.40)             | 0.36 (0.37)                      | <0.001  |
| Ease of use         | -0.34 (0.34)                     | 0.12 (0.31)             | 0.42 (0.28)                      | <0.001  |
| Provider competence | -0.04 (0.24)                     | 0.05 (0.34)             | 0.17 (0.30)                      | 0.037   |
| Timely action       | -0.14 (0.39)                     | 0.20 (0.40)             | 0.44 (0.42)                      | <0.001  |

NPS: Net promoter score
